# Supplementary material for: miR-31-NUMB Cascade Modulates Monocarboxylate Transporters to Increase Oncogenicity and Lactate Production of Oral Carcinoma Cells
Source: MDPI journal article supplement (doi:10.3390/ijms222111731), 2021-10-29
Supplement: s1 [file s1]

## Supplementary Tables

**Table S1. siRNA and Scr control**

|                                       |                          |        |
|---------------------------------------|--------------------------|--------|
| Silencer™ siRNA Control No.1          | Thermo Fisher Scientific | AM4611 |
| Silencer™ <i>NUMB</i> siRNA           | Thermo Fisher Scientific | 13537  |
| Silencer™ <i>MCT1 (SLC16A1)</i> siRNA | Thermo Fisher Scientific | 106943 |
| Silencer™ <i>MCT4 (SLC16A3)</i> siRNA | Thermo Fisher Scientific | 106945 |

**Table S2. Probes used for qRT-PCR**

|                       |                          |               |
|-----------------------|--------------------------|---------------|
| <i>GAPDH</i>          | Thermo Fisher Scientific | Hs00266705_g1 |
| <i>miR-31</i>         | Thermo Fisher Scientific | 002495        |
| <i>NUMB</i>           | Thermo Fisher Scientific | Hs01105433_m1 |
| <i>RNU6B</i>          | Thermo Fisher Scientific | 001093        |
| <i>SLC16A1 (MCT1)</i> | Thermo Fisher Scientific | 4351372       |
| <i>SLC16A3 (MCT4)</i> | Thermo Fisher Scientific | 4331182       |

**Table S3. Antibodies used in this study**

|                   |                    |           |        |          |
|-------------------|--------------------|-----------|--------|----------|
| GAPDH             | Santa Cruz Biotech | sc-22233  | Mouse  | 1:10,000 |
| GLUT1             | Abcam              | ab32551   | Rabbit | 1:500    |
| GLUT4             | Abcam              | Ab15311   | Rabbit | 1:500    |
| HIF1 $\alpha$     | BD Biosciences     | 610958    | Mouse  | 1:1,000  |
| MCT1              | Santa Cruz Biotech | sc-365501 | Mouse  | 1:500    |
| MCT4              | Santa Cruz Biotech | sc-376140 | Mouse  | 1:500    |
| NUMB              | Abcam              | ab14140   | Rabbit | 1:1,000  |
| Ubiquitin         | Invitrogen         | 13-1600   | Mouse  | 1:1,000  |
| anti-mouse-(HRP)  | Millipore          | AP124P    | Goat   | 1:1,000  |
| anti-rabbit-(HRP) | Millipore          | AP132P    | Goat   | 1:1,000  |

**Table S4. Design of sgDNAs for CRISPR/Cas9 approach**

|                         | Sense oligonucleotide     | Antisense oligonucleotide |
|-------------------------|---------------------------|---------------------------|
| <i>miR-31</i> 5' sgRNA  | CACCGTAACTTGGAAGTGGAGAGG  | AAACCCCTCTCCAGTTCCAAGTTAC |
| <i>miR-31</i> 3' sgRNA  | CACCGTGCTGGCATAGCTGTTGAAC | AAACGTTCAACAGCTATGCCAGCAC |
| <i>NUMB</i> sgRNA       | CACCGTGCCACTGATGTGGACGAC  | AAACGTCGTCCACATCAGTGGCAC  |
| <i>NUMB</i> dCas9-SAM#6 | CACCGTTAGAAGTATGAAAGAGGGT | AAACACCCTCTTTCATACTTCTAAC |

**Table S5. Primers for PCR**

| Objective                                     | Forward / Reverse primer (5' to 3') | PCR product (bp)     |
|-----------------------------------------------|-------------------------------------|----------------------|
| <i>miR-31</i> deletion detection              | AGCGGACACTCTAAGGAAGAC               | WT: 281<br>Del: ~253 |
|                                               | GCACATACACAGCAATACACG               |                      |
| <i>NUMB</i> indel detection                   | CTGAGGCTTGGTGAAGTTACG               | ~526                 |
|                                               | CATGAAGCAGTGACAGATCCAG              |                      |
| pcDNA3.1 (-)<br><i>MCT1</i> oe construct      | GGCCTCGAGGCCACCATGCCACCAGCAGTT      | 1530                 |
|                                               | GCGGGATCCTCATCAGACTGGACTTTCCTCCTCC  |                      |
| pcDNA3.1 (-)<br><i>MCT4</i> oe construct      | GGCCTCGAGGCCACCATGGGAGGGGCCGTG      | 1425                 |
|                                               | GCGGGATCCTCAGACACTTGTTTCCGGGGTG     |                      |
| pcDNA3.1 (+)<br><i>Ubiquitin</i> oe construct | CGCGGATCCATGCAGATCTTCGTGAAAACCC     | 249                  |
|                                               | CCGGAATTCTAACCACCTCTCAGACGCAG       |                      |

**Table S6. Antibodies used for immunoprecipitation**

|                    |                          |           |        |
|--------------------|--------------------------|-----------|--------|
| MCT1               | Santa Cruz Biotech       | sc-365501 | Mouse  |
| MCT4               | Santa Cruz Biotech       | sc-376140 | Mouse  |
| NUMB               | Thermo Fisher Scientific | MA5-14897 | Rabbit |
| Mouse IgG control  | Millipore                | AP106P    |        |
| Rabbit IgG control | Millipore                | AP132P    |        |

## Supplementary Figures

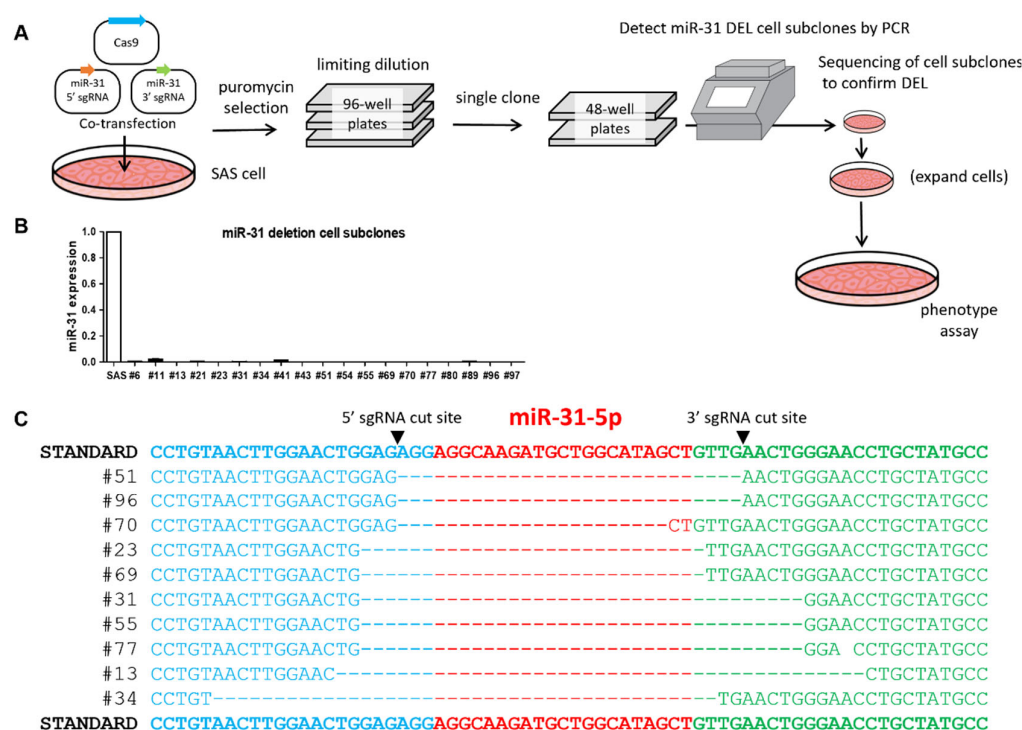

**Figure S1. *miR-31* deletion.** (A) 5'sgDNA and 3'sgDNA are designed to delete hsa-*miR-31*-5p. The procedures for the deletion of *miR-31*-5p are illustrated. (B) qRT-PCR analysis to detect *miR-31* expression. This reveals the almost complete absence of *miR-31* expression in 19 subclones acquired. (C) Sequencing reveals the truncations of various segments in 10 selected clones

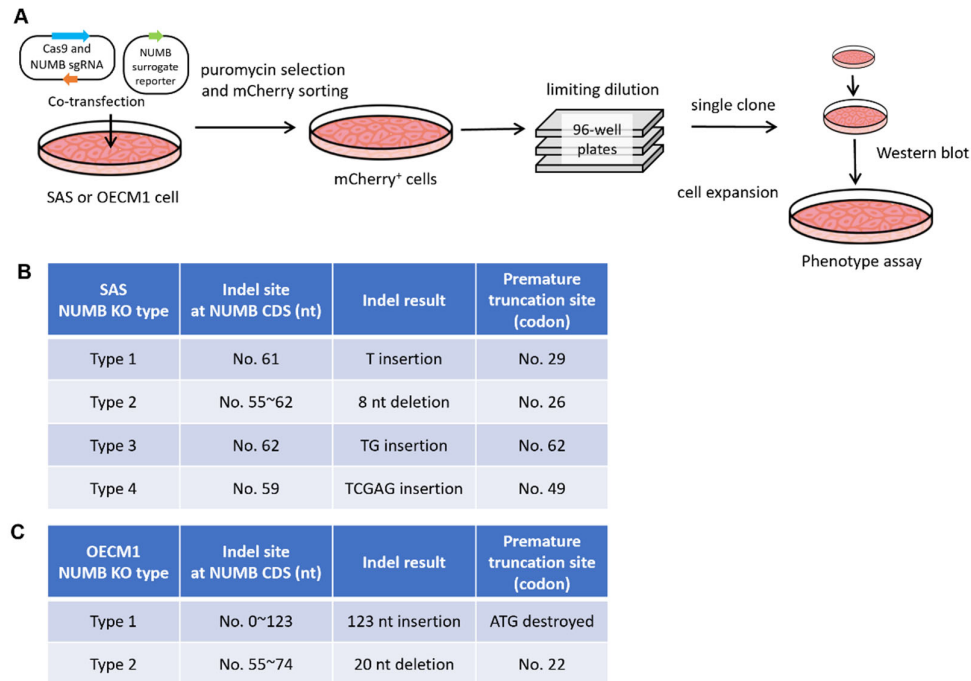

**Figure S2. *NUMB* deletion.** (A) sgRNA is designed to delete *NUMB*. The selection, sorting, and population expansion procedures of cell subclones are illustrated. (B, C) Sequencing reveals the varying types of *NUMB* deletion or insertion in SAS and OECM1 cell subclones, respectively.

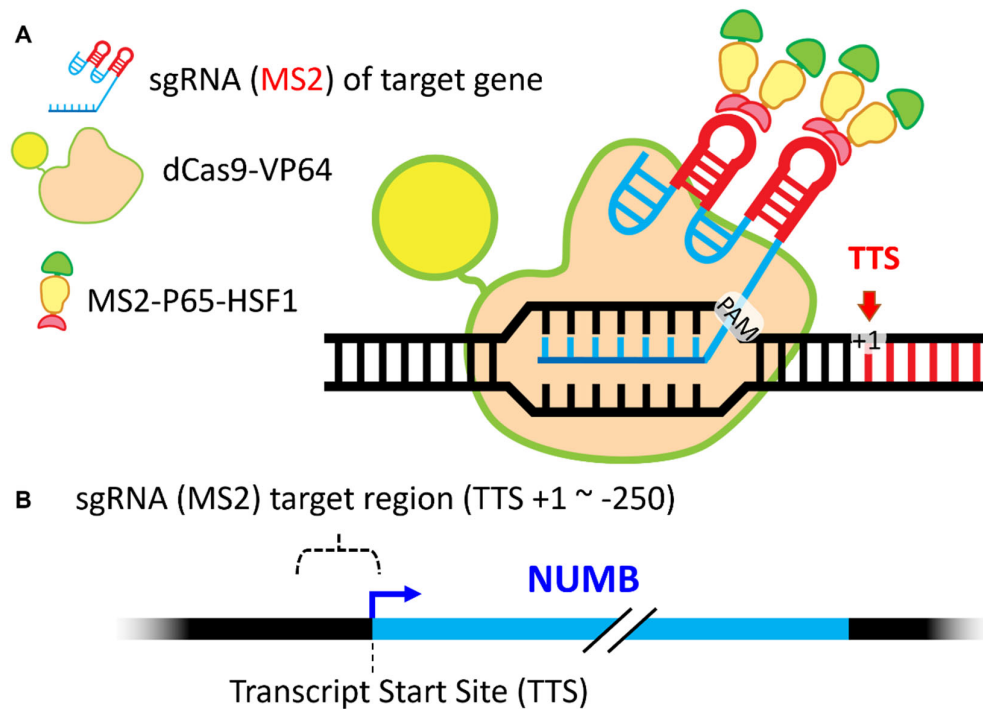

**Figure S3.** Synergistic activation mediator system for *NUMB* promoter activation. (A) Schema of components included in synergistic activation mediator (SAM) system. (B) Illustration of sgRNA targeting region in *NUMB* promoter.

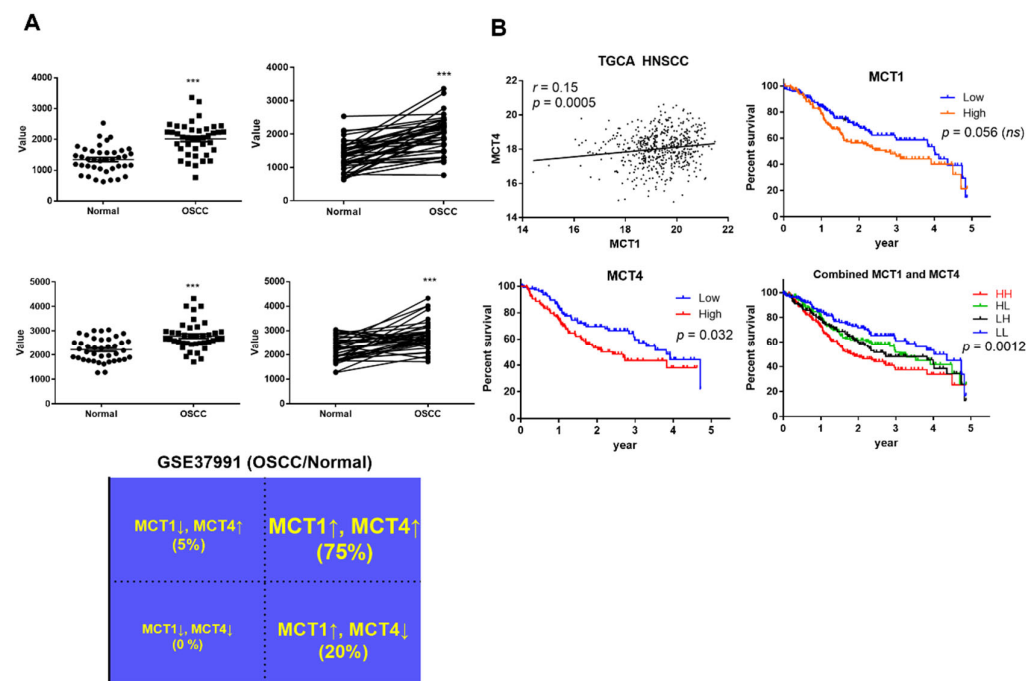

**Figure S4.** The *MCT1* and *MCT4* expression states in database. (A) GEO database GSE37991 *MCT1* (ILMN\_1757052; upper) and *MCT4* (ILMN\_2364022; middle). The un-paired *t*-test (left) and paired *t*-test (right) both show a significant upregulation of *MCT1* and *MCT4* in OSCC relative to matched normal tissue. A three-fourth of tumors exhibit the co-upregulation of *MCT1* and *MCT4* expression (lower). (B) TCGA HNSCC database. High correlation in the expression of *MCT1* and *MCT4* is noted in HNSCC (upper left). The high *MCT1* or *MCT4* expression defines the worse HNSCC prognosis (upper right and lower left, respectively). Tumors having both high *MCT1* expression and high *MCT4* expression define the worst prognosis (lower right). *ns*, not significant; \*\*\*,  $p < 0.001$ .
